# Supplementary material
Source: publisher figshare collection journal article supplement (https://frontiersin.figshare.com/ndownloader/files/14304278)
Supplement: Supplementary file [file 14304278]

## Supplementary File 1

The efficiencies (E) of the primer-specific polymerase chain reaction (PCR) amplifications and variation of  $\Delta CT$  ( $Ct_{Target}-Ct_{TIP41}$ ) with template dilution

| Gene            | R <sup>2</sup> | Slope   | E      |
|-----------------|----------------|---------|--------|
| <i>BnTIP41</i>  | 0.9998         | -3.3915 | 97.18% |
| <i>BnMPK3</i>   | 0.9998         | -3.3956 | 97.01% |
| <i>BnPR1</i>    | 0.9995         | -3.3385 | 99.31% |
| <i>BnWRKY70</i> | 0.9996         | -3.3506 | 98.82% |
| <i>BnRDF1.2</i> | 0.9983         | -3.3291 | 99.70% |
| <i>BnEIN3</i>   | 0.9997         | -3.3276 | 99.76% |
| <i>BnVSP1</i>   | 0.9997         | -3.3514 | 98.78% |
| <i>BnVSP2</i>   | 0.9999         | -3.3414 | 99.19% |
| <i>BnJR1</i>    | 1              | -3.4384 | 95.36% |
| <i>BnPAL</i>    | 0.9997         | -3.3658 | 98.20% |
| <i>BnICS1</i>   | 0.9998         | -3.3368 | 99.38% |
| <i>BnLOX2</i>   | 0.9999         | -3.3608 | 98.40% |
| <i>BnAOS</i>    | 0.9991         | -3.4404 | 95.28% |
| <i>BnACS1</i>   | 0.9997         | -3.3708 | 98.00% |
| <i>BnACS2</i>   | 0.9996         | -3.3688 | 98.08% |
| <i>BnACS6</i>   | 0.9999         | -3.4091 | 96.49% |
| <i>BnACS7</i>   | 0.9995         | -3.3591 | 98.47% |
| <i>BnACS8</i>   | 0.9995         | -3.3644 | 98.26% |

$$E=10^{(1/-\text{slope})}-1$$

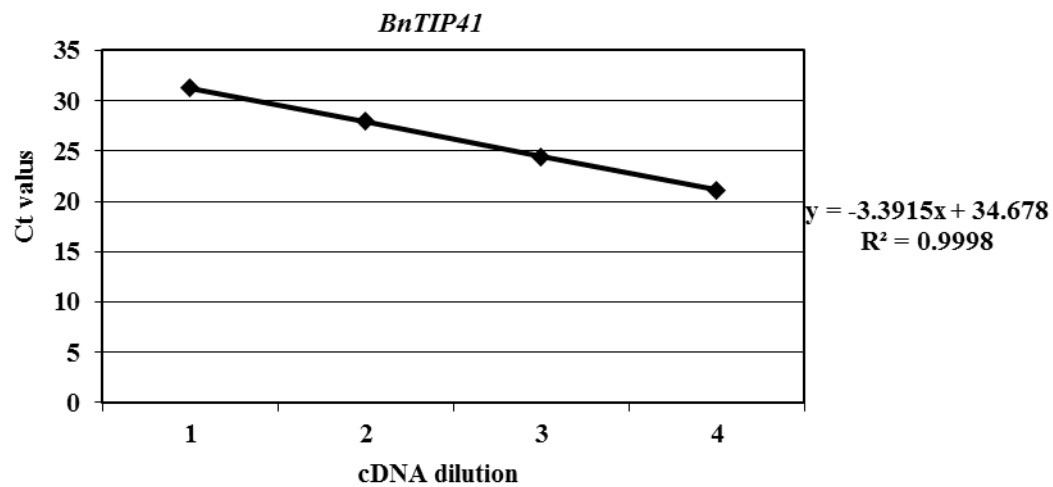

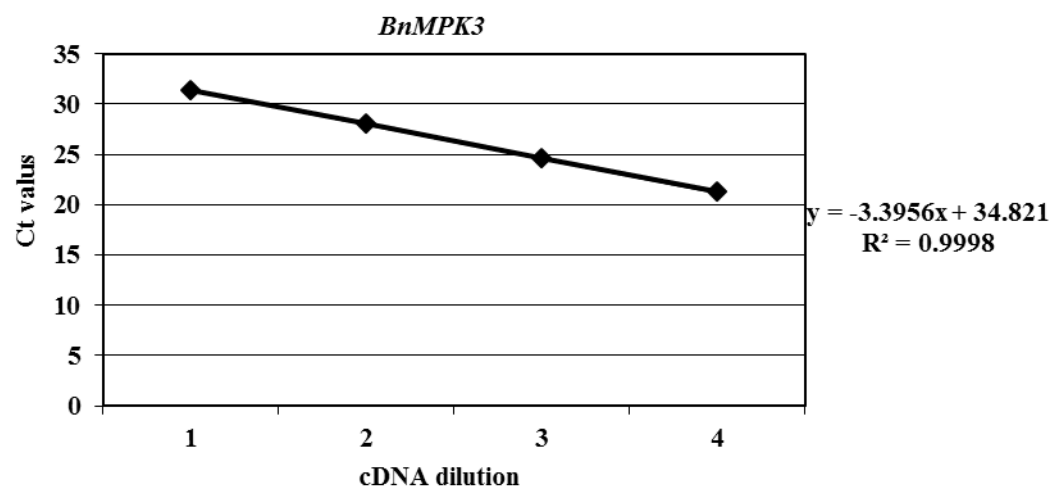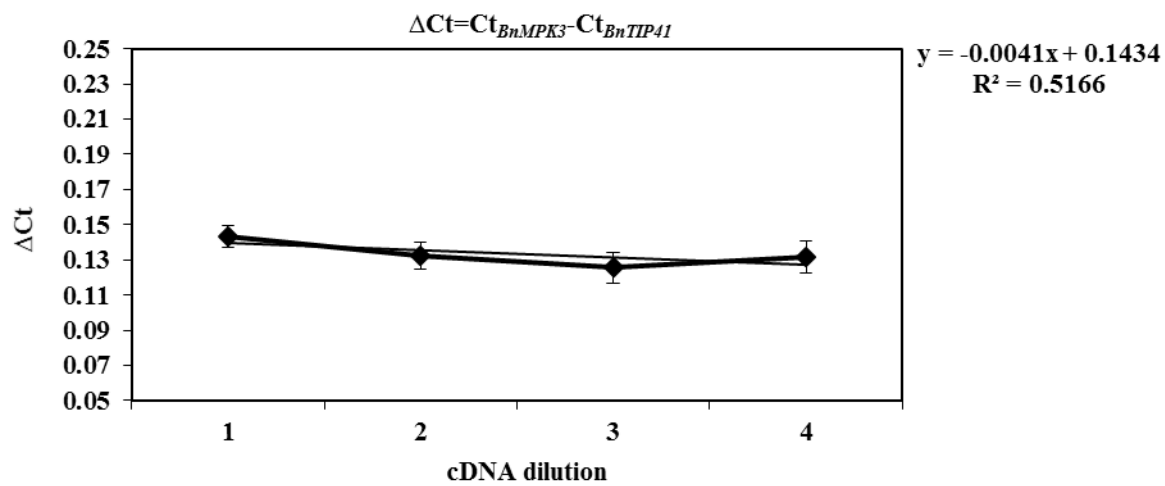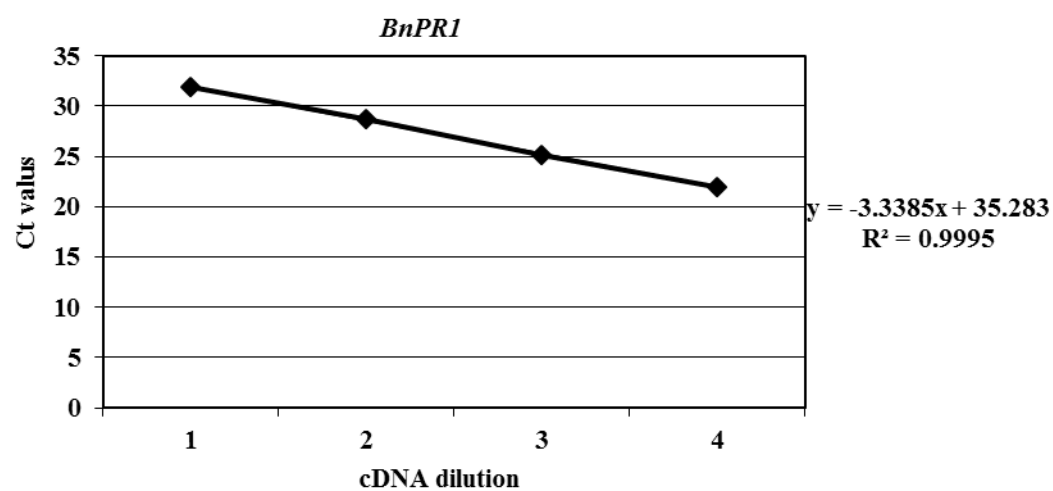

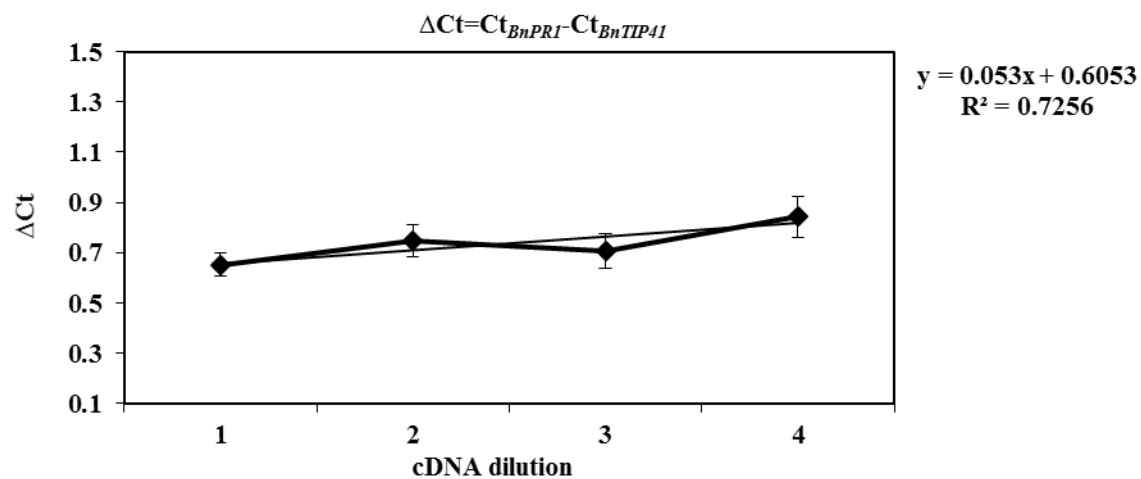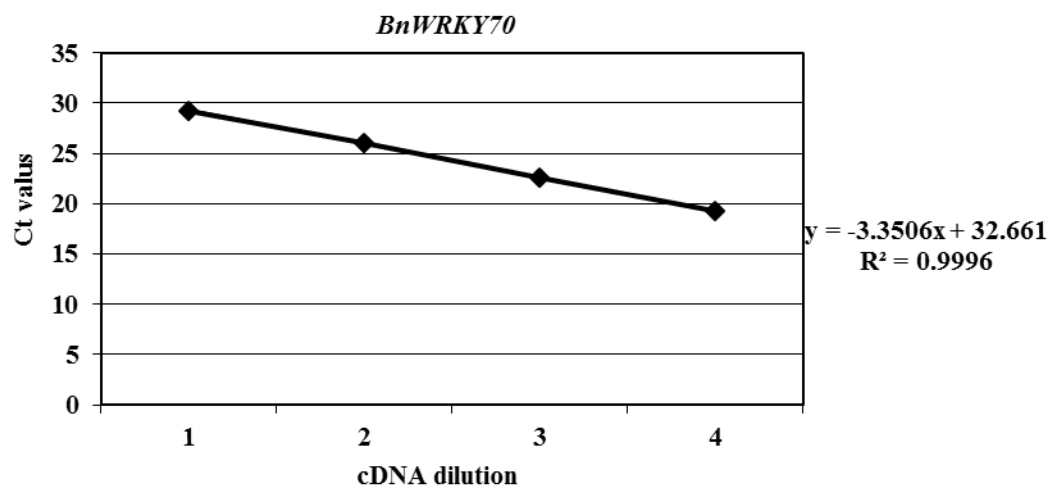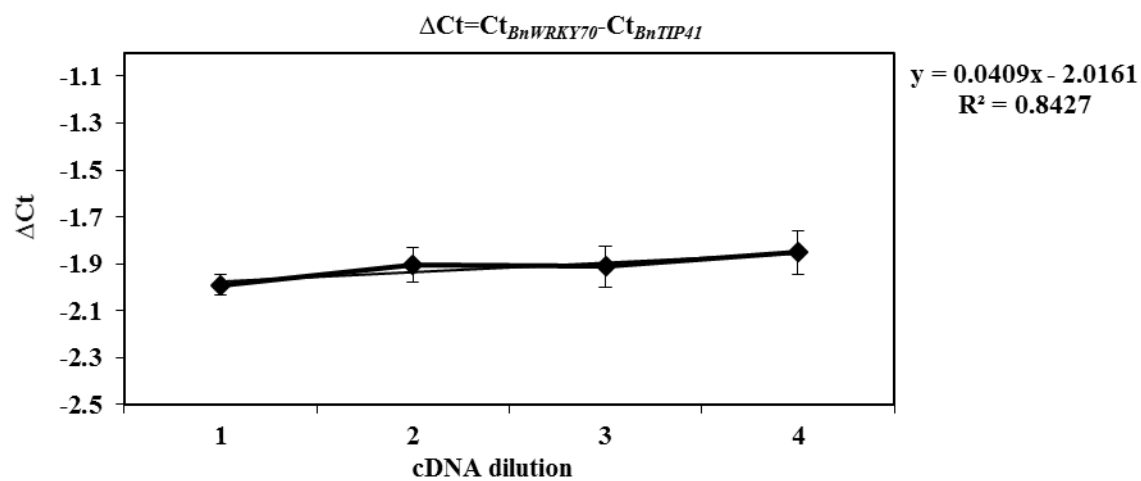

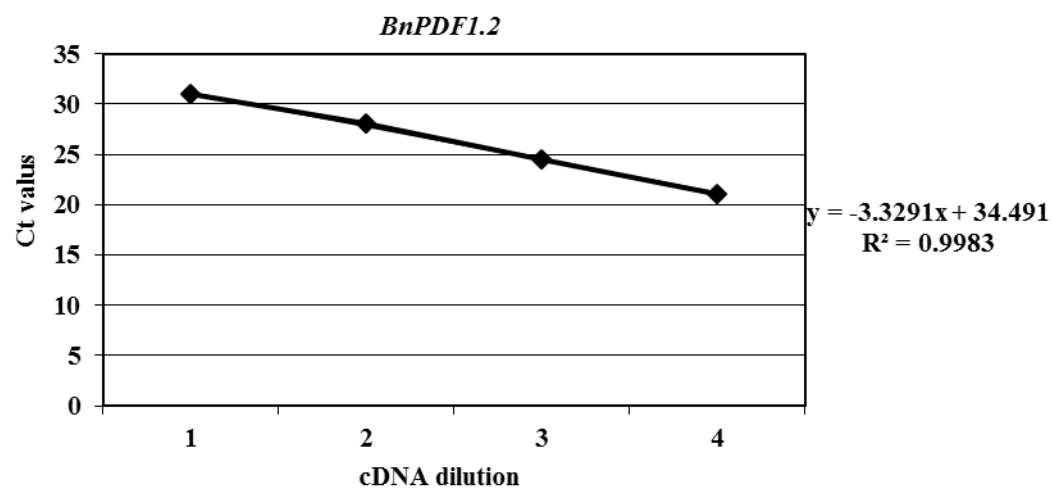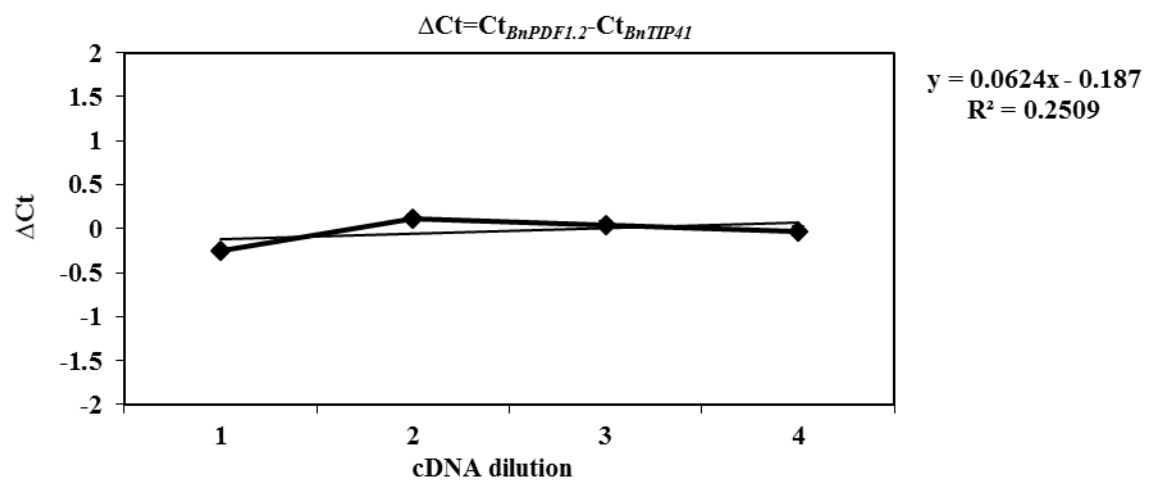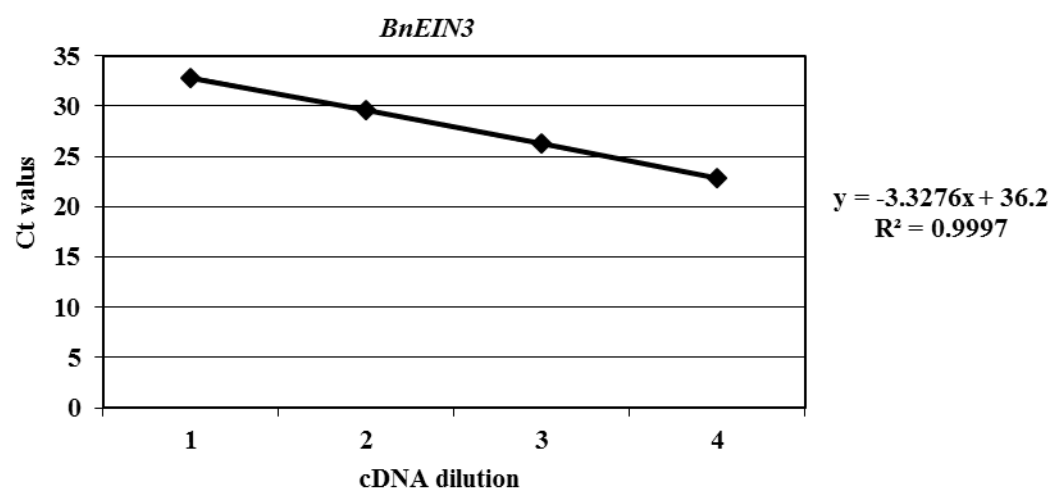

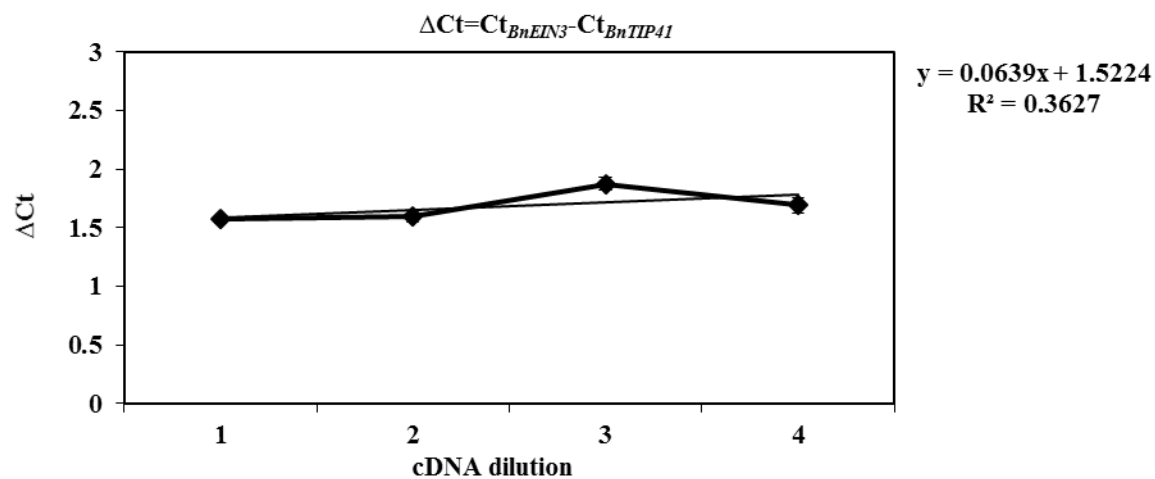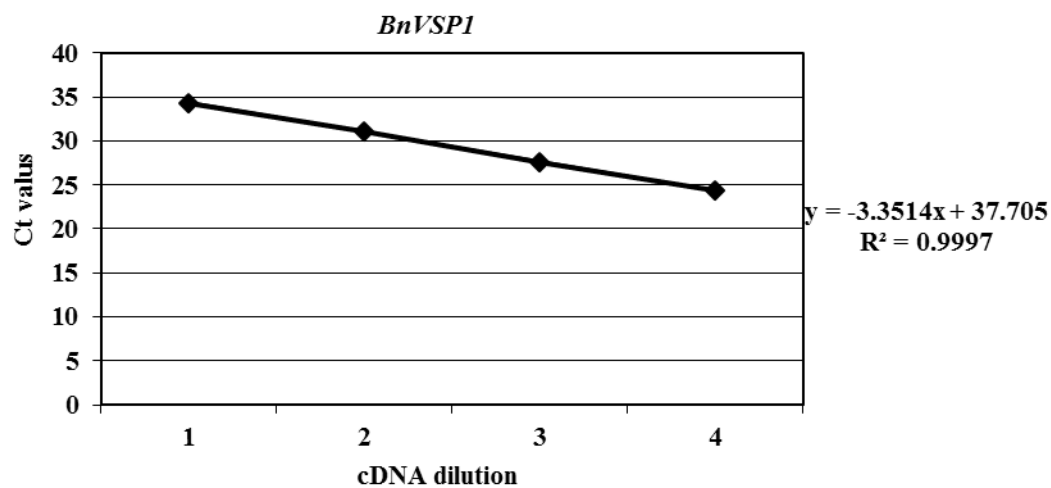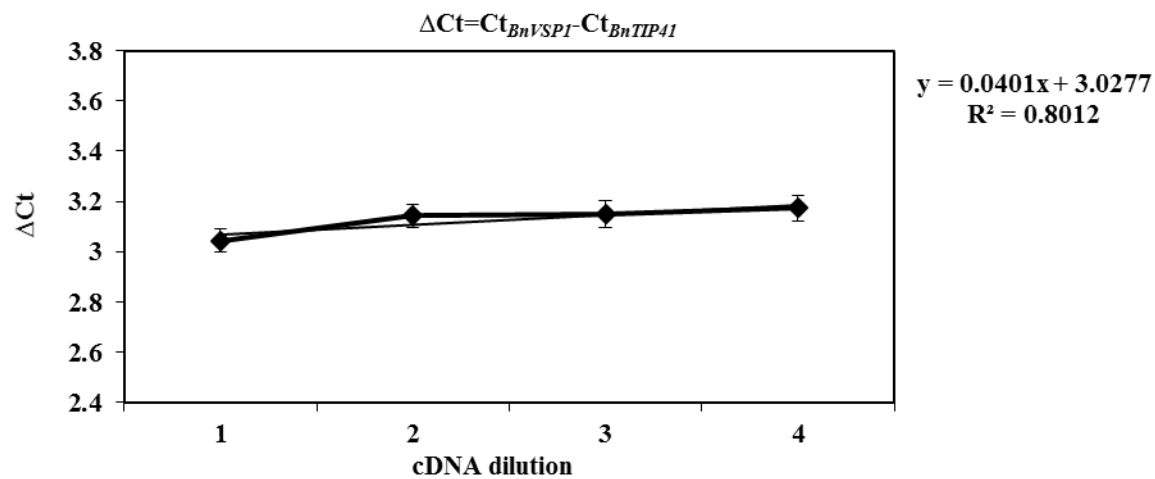

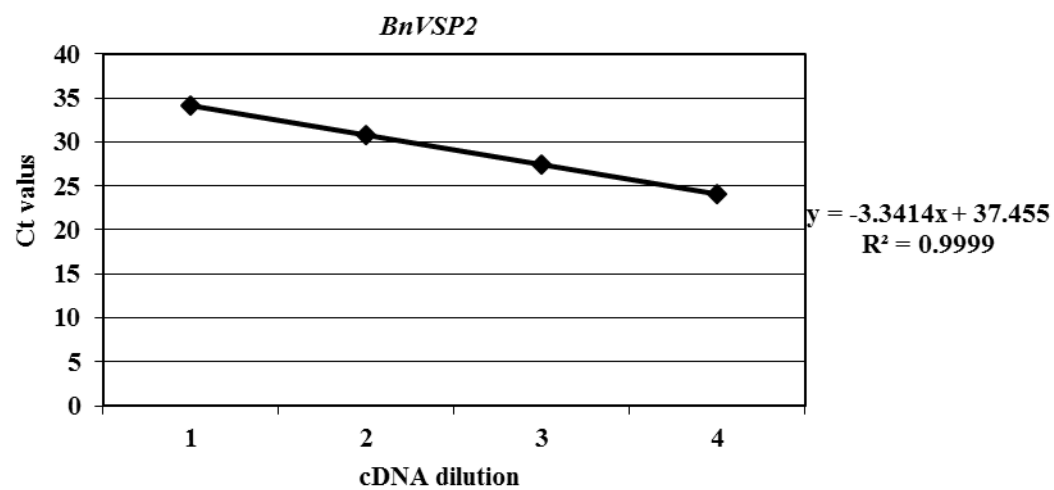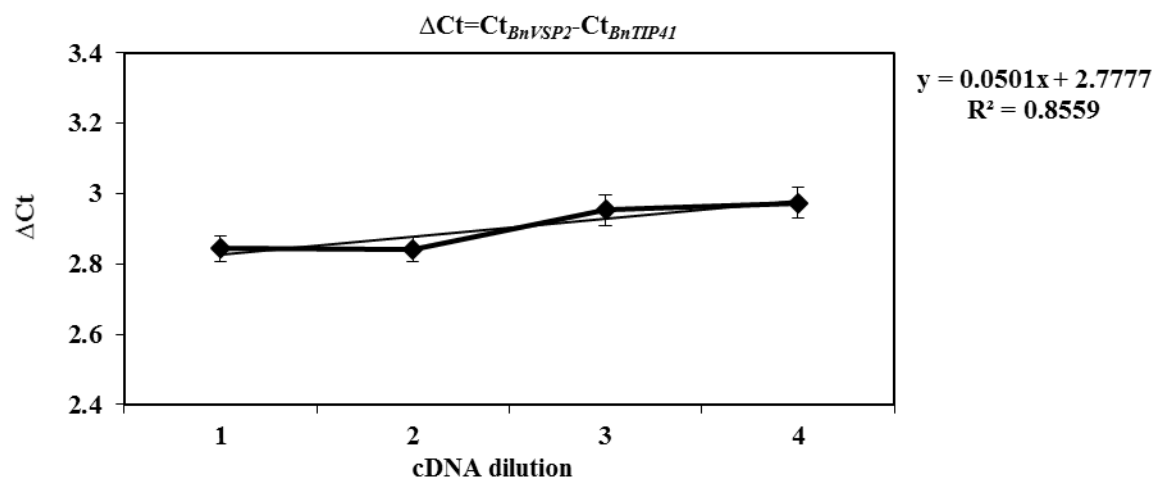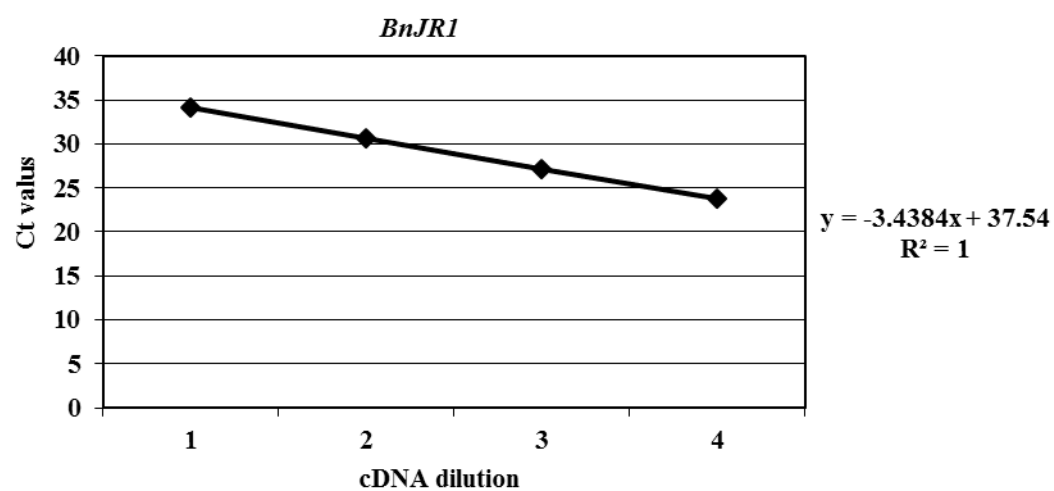

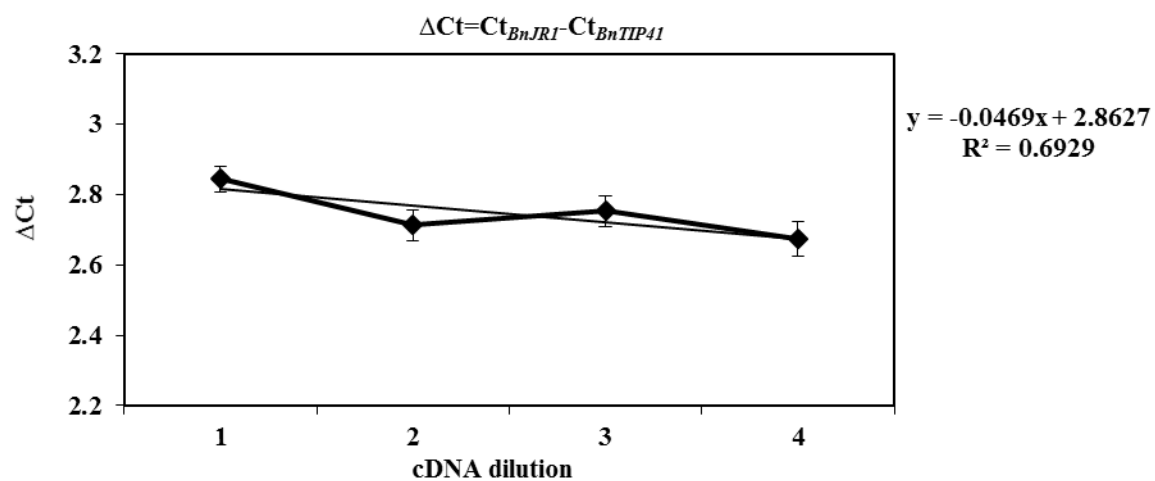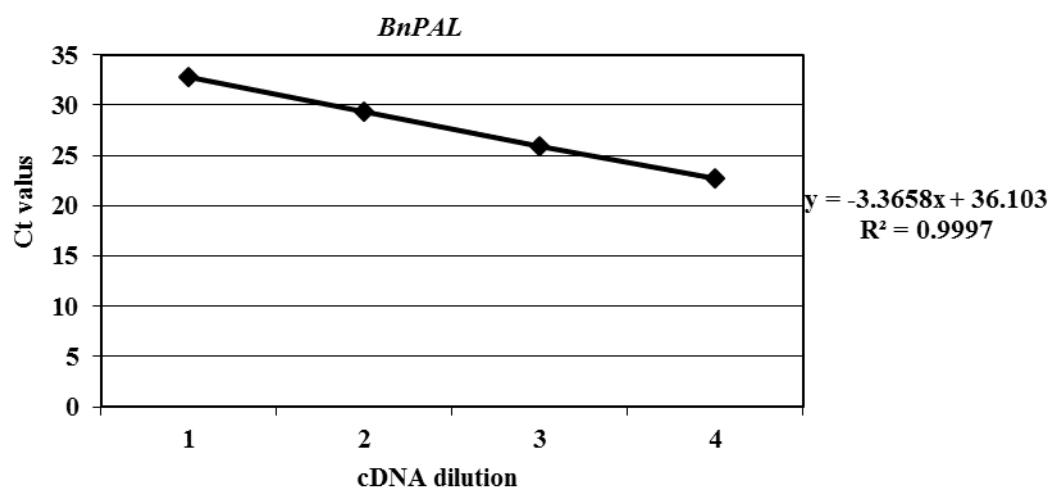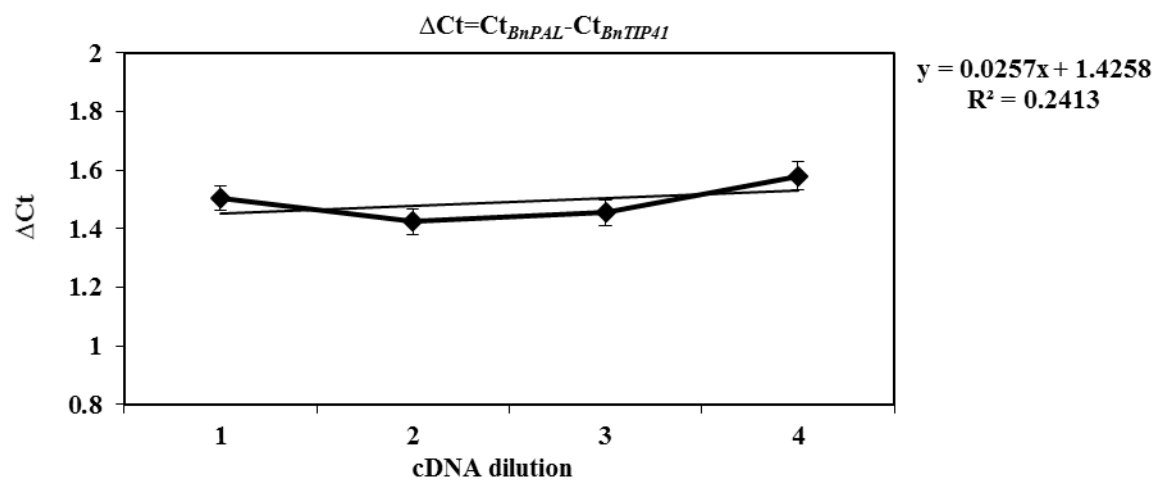

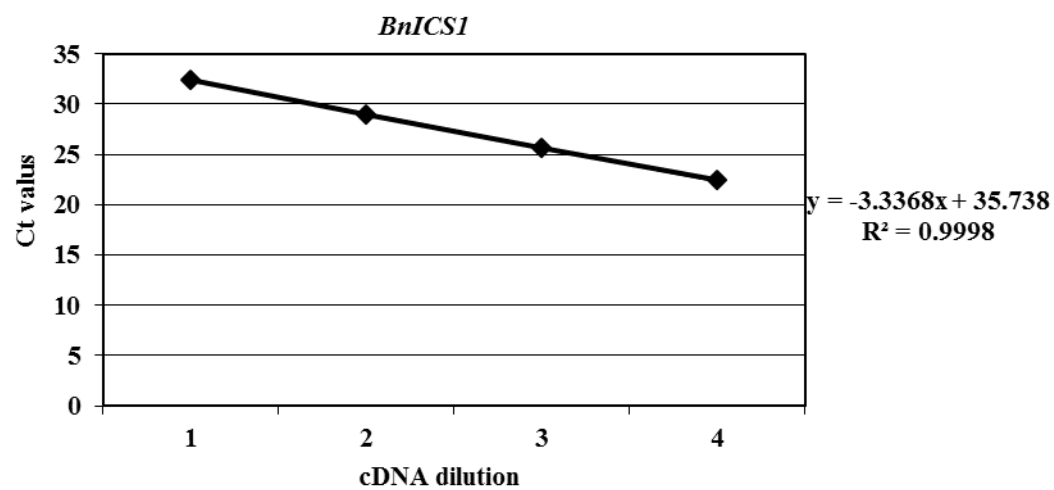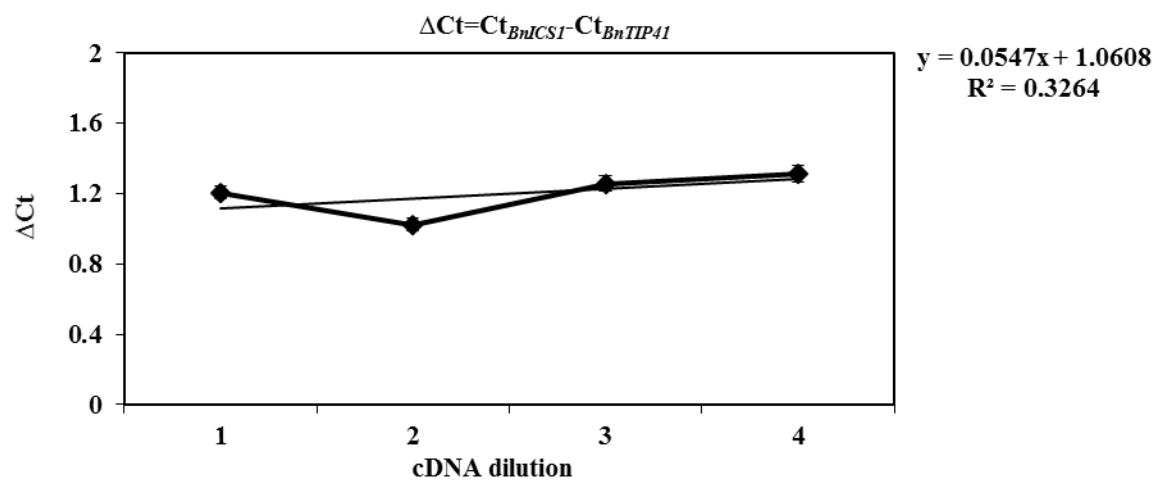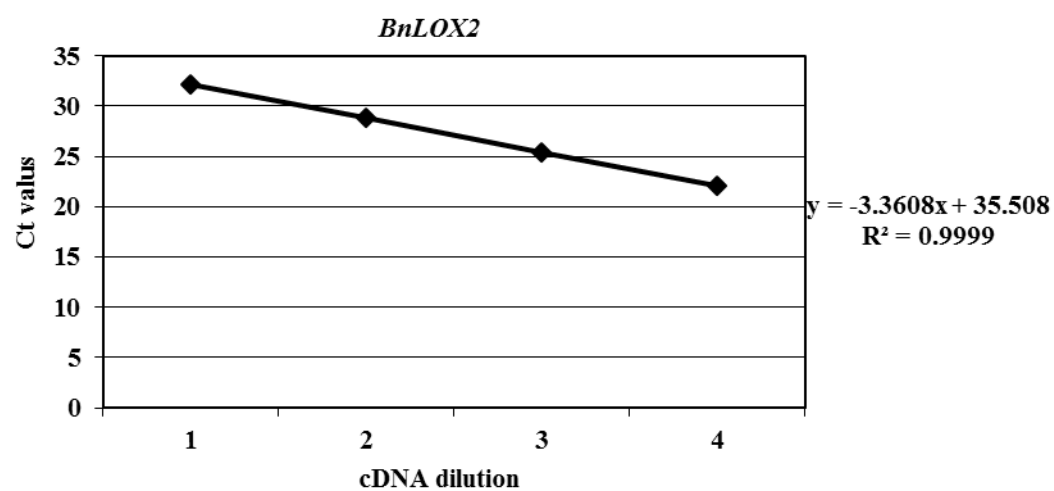



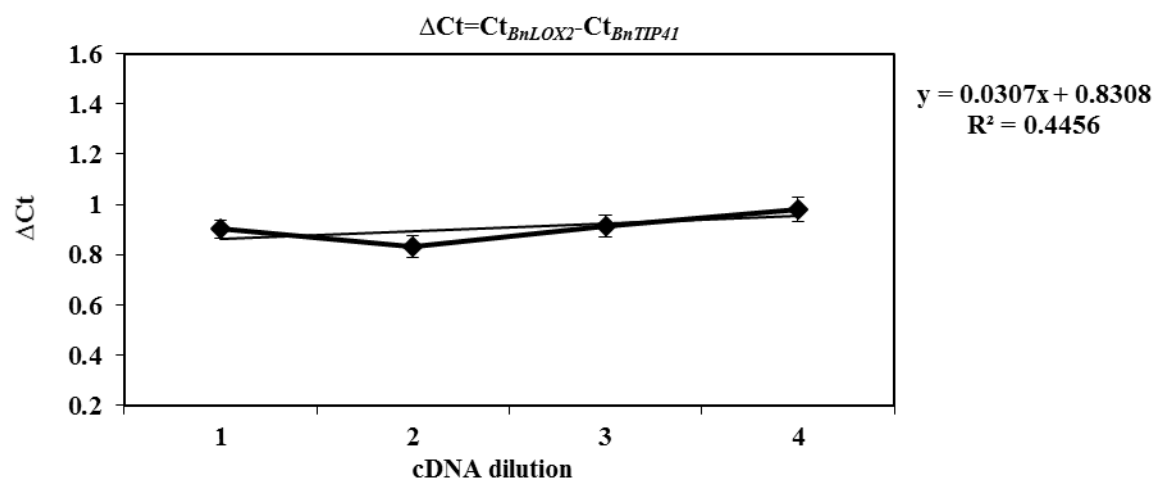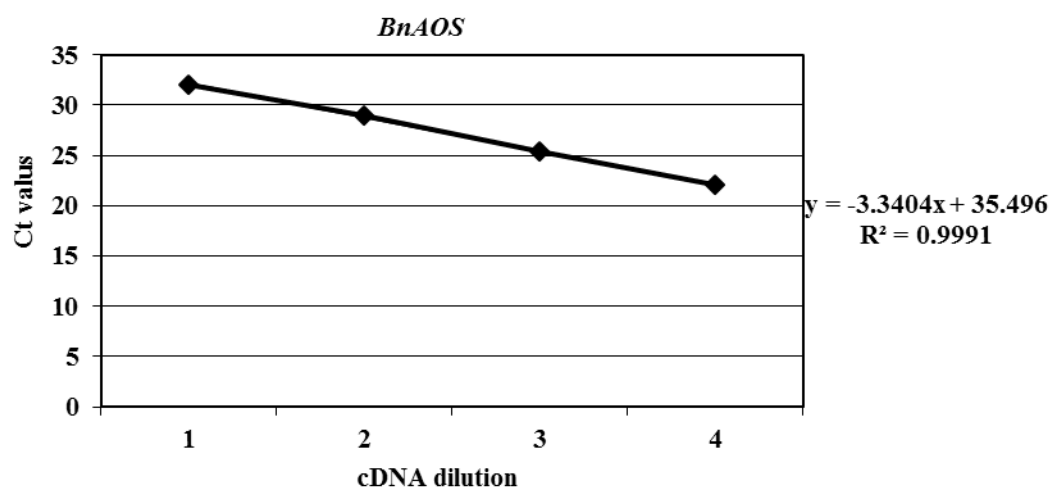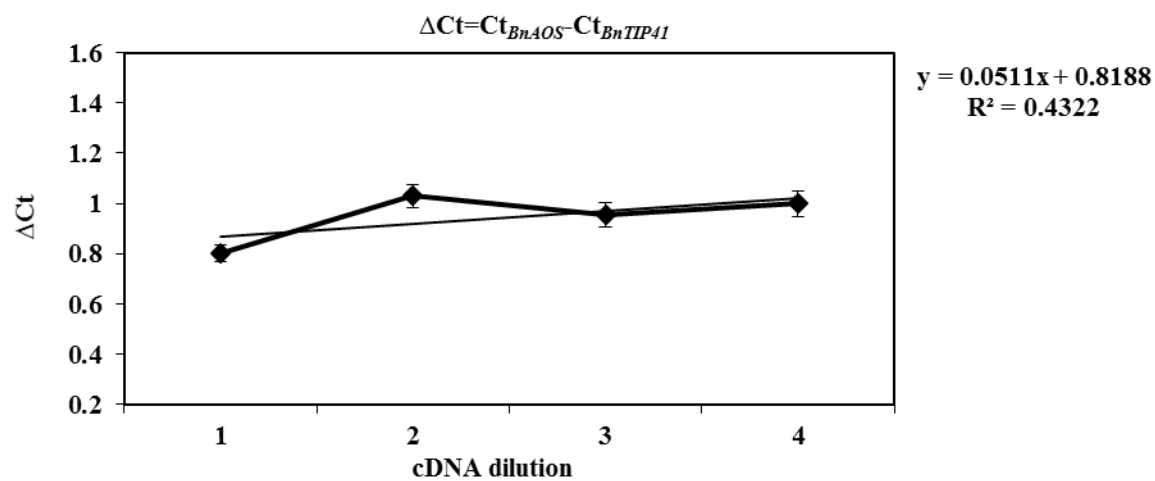

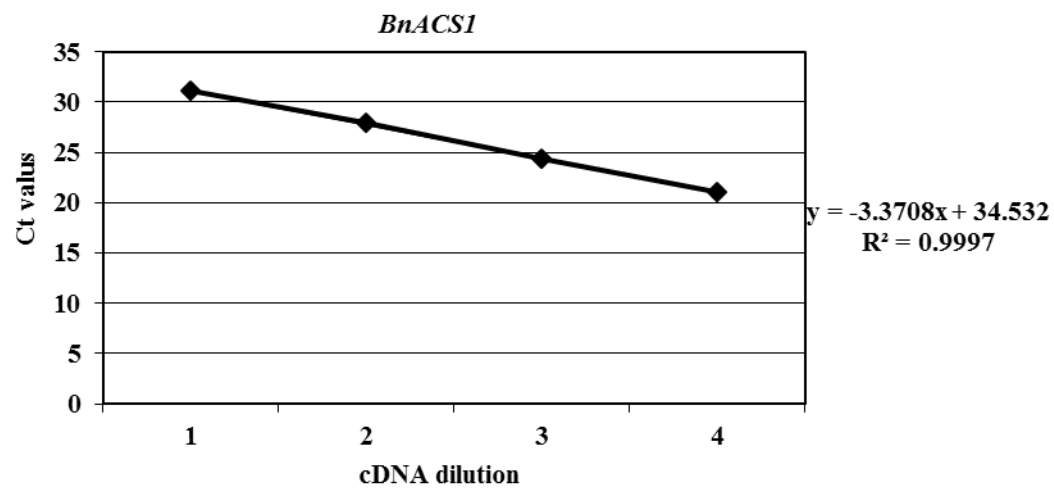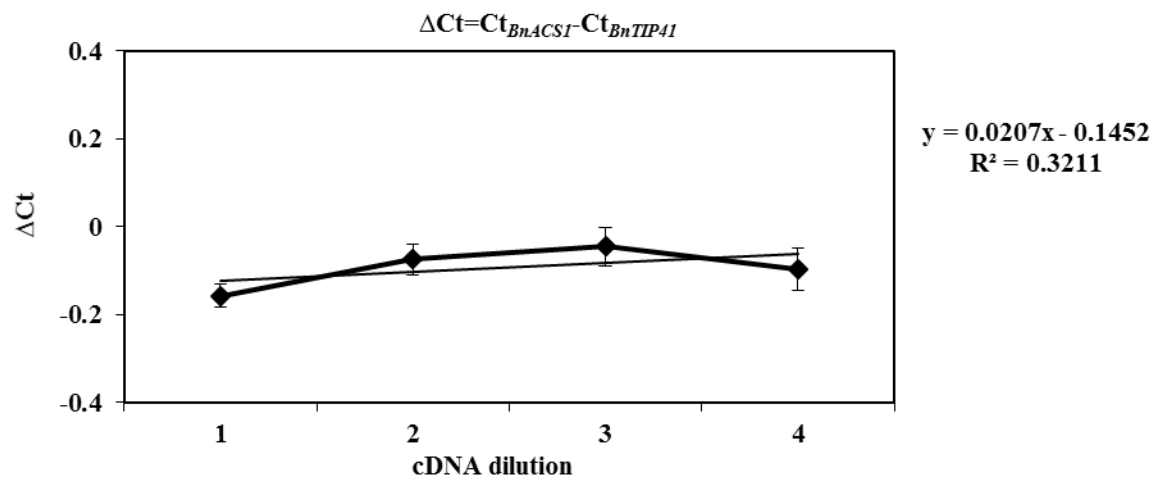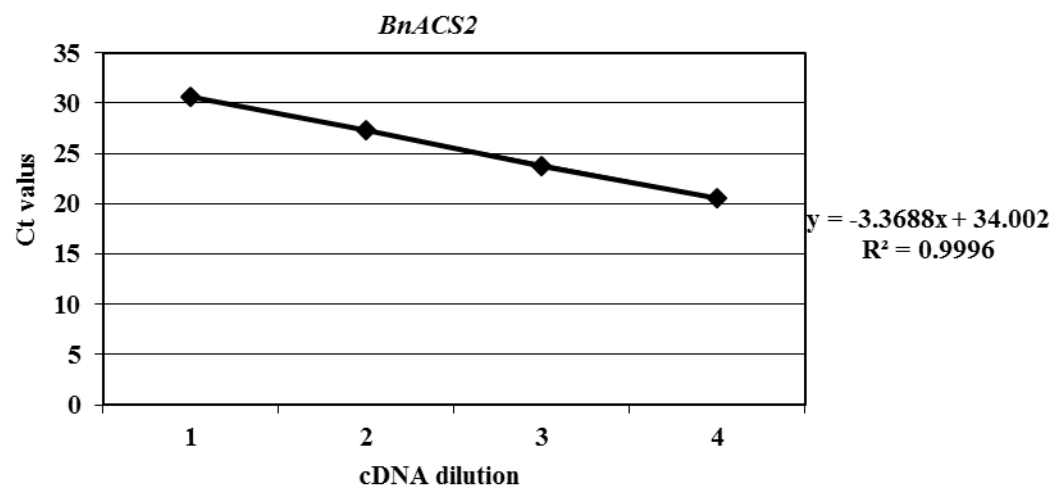

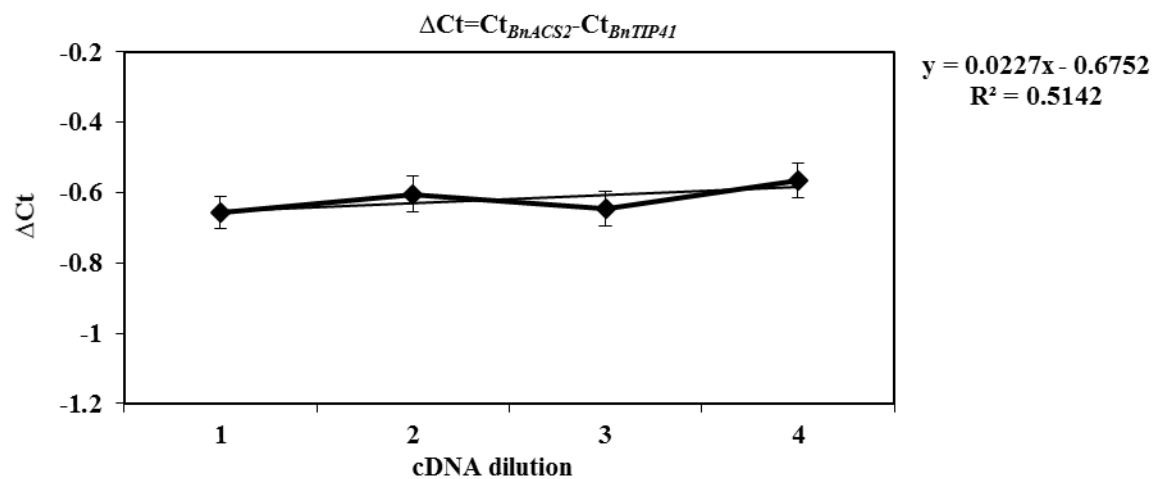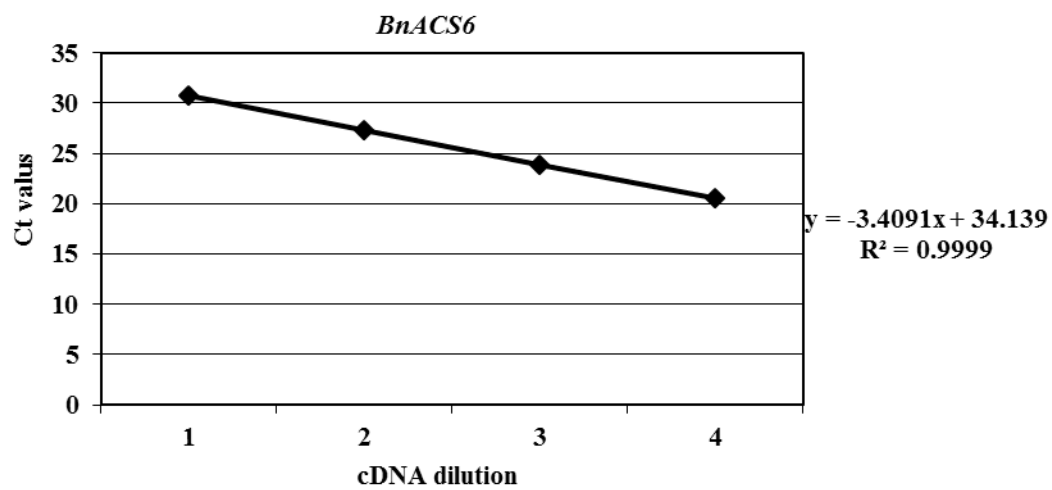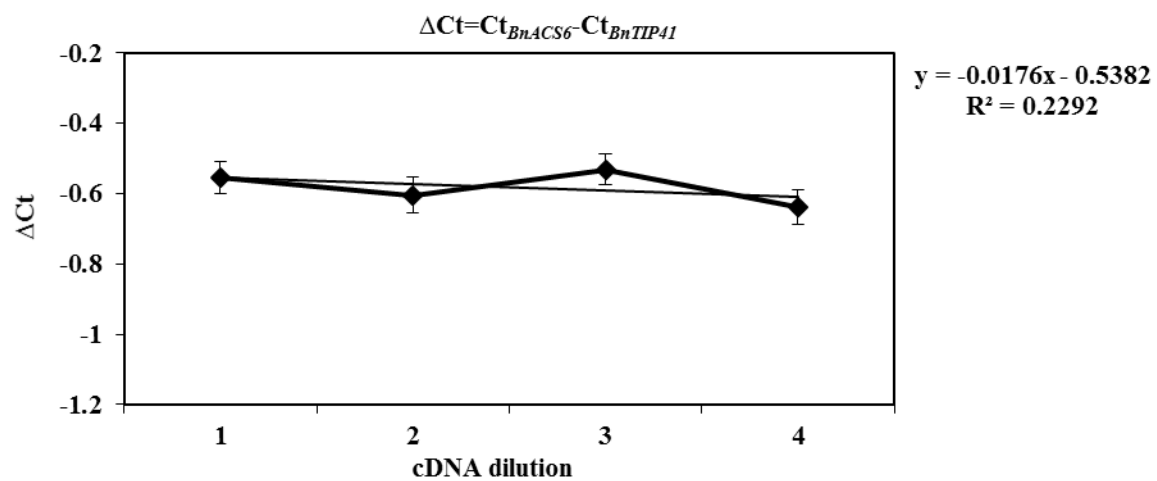

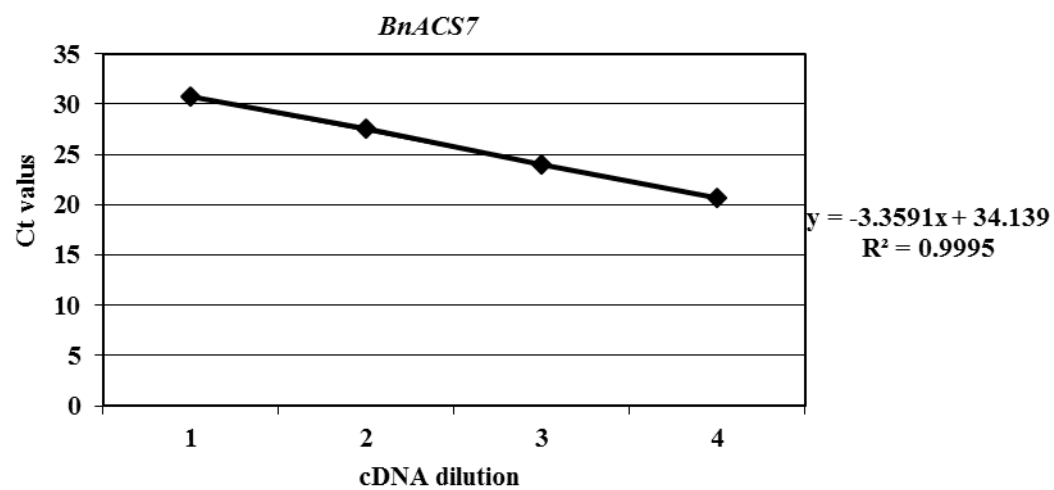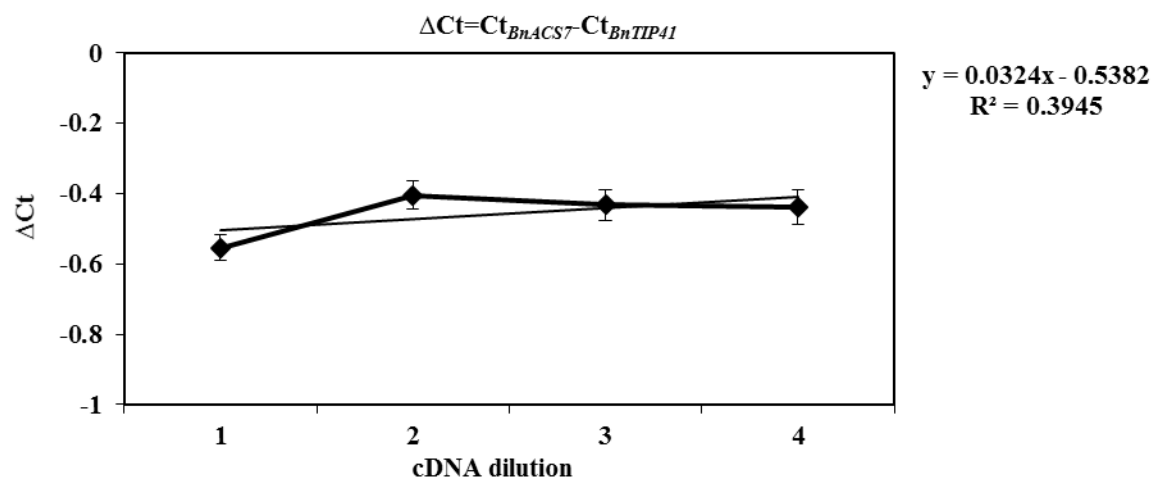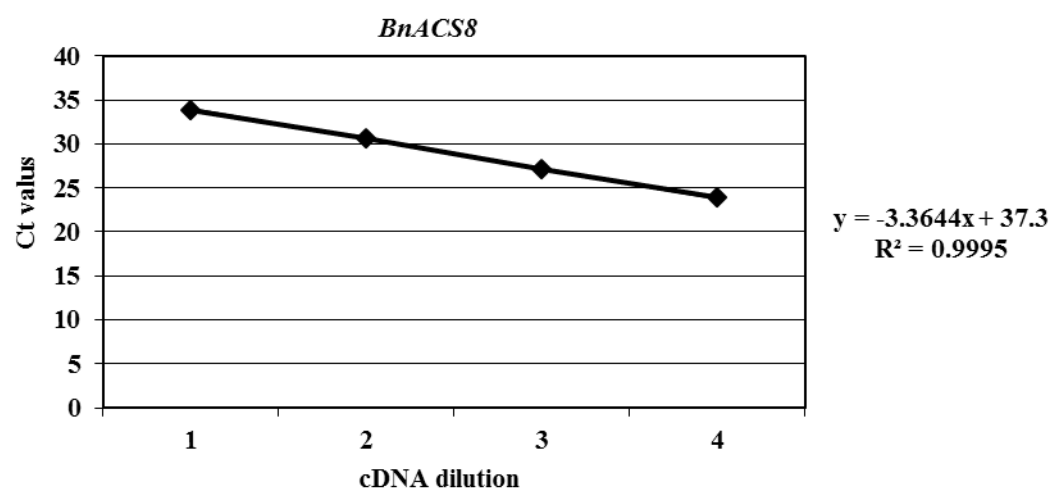

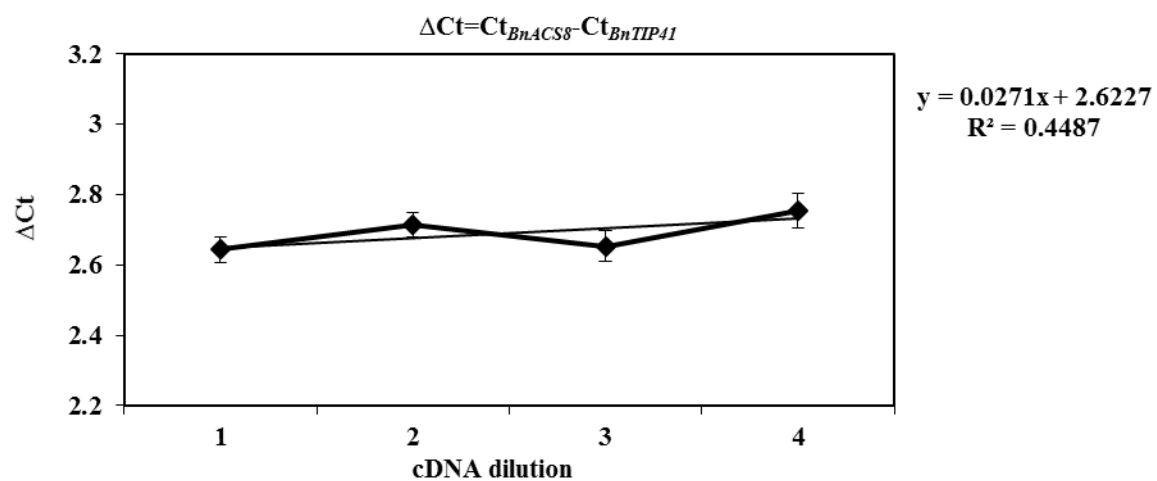

cDNA dilution (1= 0.001; 2= 0.01; 3= 0.1;4=1)
